# Supplementary material for: N,N′-Diphenyl-1,4-phenylenediamine Antioxidant’s Potential Role in Enhancing the Pancreatic Antioxidant, Immunomodulatory, and Anti-Apoptotic Therapeutic Capabilities of Adipose-Derived Stem Cells in Type I Diabetic Rats
Source: MDPI journal article supplement (doi:10.3390/antiox12010058), 2022-12-27
Supplement: s1 [file s1]

# ***N,N'*-Diphenyl-1,4-phenylenediamine Antioxidant's Potential Role in Enhancing the Pancreatic Antioxidant, Immunomodulatory, and Anti-Apoptotic Therapeutic Capabilities of Adipose-Derived Stem Cells in Type I Diabetic Rats**

Saad Shaaban <sup>1,2,\*</sup>, Hemdan El-Shamy <sup>3,4</sup>, Mohamed Gouda <sup>1</sup>, Marwa K. Darwish <sup>5,6</sup>, Hany M. Abd El-Lateef <sup>1,7</sup>, Mai M. Khalaf <sup>1,7</sup>, Ehab I. El-Hallous <sup>8,9</sup>, Kholoud H. Radwan <sup>10</sup>, Hanan M. Rashwan <sup>8</sup> and Shady G. El-Sawah <sup>8,\*</sup>

<sup>1</sup> Department of Chemistry, College of Science, King Faisal University, P.O. Box 380, Al-Ahsa 31982, Saudi Arabia

<sup>2</sup> Department of Chemistry, Organic Chemistry Division, College of Science, Mansoura University, P.O. Box 11432, Mansoura 11001, Egypt

<sup>3</sup> Deanship of Student Affairs, King Faisal University, P.O. Box 380, Al-Ahsa 31982, Saudi Arabia

<sup>4</sup> Department of Psychology, Statistics and Educational Evaluation, Faculty of Education, Al-Azhar University, P.O. Box 11751, Cairo 4434003, Egypt

<sup>5</sup> Chemistry Department (Biochemistry Branch), Faculty of Science, Suez University, P.O. Box 43518, Suez 8151650, Egypt

<sup>6</sup> Department of Medical Laboratories Sciences, College of Applied Medical Sciences, Shaqra University, Al Quwayiyah 19257, Saudi Arabia

<sup>7</sup> Chemistry Department, Faculty of Science, Sohag University, P.O. Box 82524, Sohag 1646130, Egypt

<sup>8</sup> Zoology Department, Faculty of Science, Arish University, North Sinai 31111, Egypt

<sup>9</sup> Biology Department, Faculty of Science, Taif University, Taif 21944, Saudi Arabia

<sup>10</sup> Department of Biochemistry, Horus University in Egypt HUE, Damietta 7991164, Egypt

\* Correspondence: sibrahim@kfu.edu.sa or dr\_saad\_chem@mans.edu.eg (S.S.); dr.shadygamal83@gmail.com (S.G.E.-S.)

**Table S1.** Serum glucose, insulin, C-peptide, and HbA1c levels.

|                                |             | Control | DPPD   | Diabetic (D)        | D + DPPD             | D + ADMSCs           | D + AD-MSCs+DPPD     |
|--------------------------------|-------------|---------|--------|---------------------|----------------------|----------------------|----------------------|
| <b>Glucose</b><br>(mg/ 100 ml) | <b>Mean</b> | 92.83   | 93.33  | 395.20              | 174.20               | 133.66               | 105.50               |
|                                | <b>±SEM</b> | ± 3.14  | ± 4.28 | ±14.33 <sup>a</sup> | ±5.24 <sup>ab</sup>  | ±4.65 <sup>ab</sup>  | ±5.17 <sup>bc</sup>  |
|                                | <b>%</b>    |         |        |                     | -55.92               | -66.17               | -73.30               |
| <b>Insulin</b><br>(µ I U/ml)   | <b>Mean</b> | 17.10   | 17.20  | 8.16                | 14.37                | 15.47                | 16.90                |
|                                | <b>±SEM</b> | ± 0.53  | ± 0.61 | ±0.37 <sup>a</sup>  | ±0.42 <sup>ab</sup>  | ± 1.05 <sup>ab</sup> | ±0.56 <sup>bc</sup>  |
|                                | <b>%</b>    |         |        |                     | +76.10               | +89.58               | +107.10              |
| <b>C-peptide</b><br>(ng/ml)    | <b>Mean</b> | 0.87    | 0.84   | 0.31                | 0.75                 | 0.81                 | 0.86                 |
|                                | <b>±SEM</b> | ± 0.02  | ± 0.03 | ± 0.01 <sup>a</sup> | ± 0.03 <sup>ab</sup> | ± 0.02 <sup>ab</sup> | ± 0.03 <sup>bc</sup> |
|                                | <b>%</b>    |         |        |                     | +141.93              | +161.29              | +177.41              |
| <b>HbA1c</b><br>(%)            | <b>Mean</b> | 2.90    | 3.13   | 4.94                | 3.65                 | 3.10                 | 2.92                 |
|                                | <b>±SEM</b> | ± 0.13  | ± 0.12 | ± 0.22 <sup>a</sup> | ± 0.10 <sup>ab</sup> | ± 0.12 <sup>ab</sup> | ± 0.11 <sup>bc</sup> |
|                                | <b>%</b>    |         |        |                     | - 26.11              | - 37.24              | - 40.89              |

Values expressed as ± SEM (n = 6). <sup>a,b & c</sup> are Significant differences ( $P \leq 0.05$ ) compared to control, diabetic untreated and DPPD-diabetic treated groups, respectively. % is the percent of change compared to the diabetic group.

**Table S2.** Pancreatic OS and antioxidant markers levels.

|                                      |      | Control | DPPD   | Diabetic (D)        | D + DPPD             | D + AD-MSCs          | D + AD-MSCs+DPPD      |
|--------------------------------------|------|---------|--------|---------------------|----------------------|----------------------|-----------------------|
| MDA (n mol/g)                        | Mean | 10.30   | 10.36  | 29.84               | 18.08                | 13.00                | 11.50                 |
|                                      | ±SEM | ± 0.32  | ± 0.28 | ± 1.16              | ±1.32 <sup>ab</sup>  | ± 0.08 <sup>ab</sup> | ± 1.05 <sup>bc</sup>  |
|                                      | %    |         |        |                     | -39.41               | -56.43               | -61.46                |
| H <sub>2</sub> O <sub>2</sub> (mM/g) | Mean | 0.83    | 0.89   | 1.98                | 1.25                 | 1.10                 | 0.90                  |
|                                      | ±SEM | ± 0.02  | ± 0.03 | ± 0.06 <sup>a</sup> | ±0.02 <sup>ab</sup>  | ± 0.02 <sup>ab</sup> | ± 0.02 <sup>bc</sup>  |
|                                      | %    |         |        |                     | -36.86               | -44.44               | -54.54                |
| AGEs (AU/mg protein)                 | Mean | 2.62    | 2.53   | 8.50                | 6.11                 | 4.07                 | 2.44                  |
|                                      | ±SEM | ± 0.14  | ±0.15  | ± 0.33 <sup>a</sup> | ± 0.14 <sup>ab</sup> | ± 0.17 <sup>ab</sup> | ± 0.12 <sup>bc</sup>  |
|                                      | %    |         |        |                     | -28.11               | -52.11               | -71.29                |
| XO (U/mg)                            | Mean | 21.40   | 22.33  | 49.00               | 31.66                | 26.00                | 23.13                 |
|                                      | ±SEM | ± 1.04  | ± 1.02 | ± 2.52 <sup>a</sup> | ±1.39 <sup>ab</sup>  | ± 1.13 <sup>ab</sup> | ± 1.08 <sup>bc</sup>  |
|                                      | %    |         |        |                     | -35.38               | -46.93               | -52.79                |
| GSH (mg/g)                           | Mean | 55.00   | 53.00  | 20.56               | 36.50                | 44.00                | 53.60                 |
|                                      | ±SEM | ± 2.24  | ± 2.13 | ± 1.82 <sup>a</sup> | ±2.36 <sup>ab</sup>  | ± 2.64 <sup>ab</sup> | ± 2.93 <sup>bc</sup>  |
|                                      | %    |         |        |                     | +77.52               | +114.00              | +160.70               |
| SOD (U/g)                            | Mean | 11.33   | 11.10  | 4.56                | 7.60                 | 9.08                 | 10.80                 |
|                                      | ±SEM | ± 0.25  | ± 0.22 | ± 0.17 <sup>a</sup> | ±0.43 <sup>ab</sup>  | ± 0.43 <sup>ab</sup> | ± 0.32 <sup>bc</sup>  |
|                                      | %    |         |        |                     | +66.66               | +99.12               | +136.84               |
| CAT (U/g)                            | Mean | 0.58    | 0.62   | 0.33                | 0.46                 | 0.51                 | 0.56                  |
|                                      | ±SEM | ± 0.03  | ± 0.04 | ± 0.01 <sup>a</sup> | ±0.04 <sup>ab</sup>  | ± 0.03 <sup>ab</sup> | ± 0.03 <sup>bc</sup>  |
|                                      | %    |         |        |                     | +39.39               | +54.54               | +69.69                |
| GST (U/mg)                           | Mean | 6.15    | 6.13   | 2.60                | 5.50                 | 5.70                 | 6.02                  |
|                                      | ±SEM | ± 0.11  | ± 0.13 | ± 0.12 <sup>a</sup> | ±0.29 <sup>ab</sup>  | ± 0.22 <sup>ab</sup> | ± 0.21 <sup>bc</sup>  |
|                                      | %    |         |        |                     | +111.53              | +119.23              | +131.53               |
| TAC (mg/g)                           | Mean | 1.77    | 1.83   | 0.55                | 1.20                 | 1.40                 | 1.60                  |
|                                      | ±SEM | ± 0.06  | ± 0.02 | ± 0.02 <sup>a</sup> | ±0.07 <sup>ab</sup>  | ± 0.03 <sup>ab</sup> | ± 0.05 <sup>bc</sup>  |
|                                      | %    |         |        |                     | +118.18              | +154.54              | +190.90               |
| HO-1 (U/mg)                          | Mean | 311.00  | 307.00 | 116.00              | 235.00               | 288.00               | 306.00                |
|                                      | ±SEM | ± 11.34 | ±12.38 | ± 4.28 <sup>a</sup> | ±7.39 <sup>ab</sup>  | ± 9.76 <sup>ab</sup> | ± 10.12 <sup>bc</sup> |
|                                      | %    |         |        |                     | +102.58              | +148.27              | +163.79               |

Values expressed as ± SEM (n = 6). <sup>a,b & c</sup> are Significant differences ( $P \leq 0.05$ ) compared to control, diabetic untreated and DPPD-diabetic treated groups, respectively. % is the percent of change compared to the diabetic group.

**Table S3.** Serum CRP, TGF- $\beta$ , CD95, and IL-6 levels.

|                       |           | Control    | DPPD       | Diabetic (D) | D + DPPD        | D + ADMSCs      | D + AD-MSCs+DPPD |
|-----------------------|-----------|------------|------------|--------------|-----------------|-----------------|------------------|
| CRP (g/dl)            | Mean      | 3.50       | 3.40       | 18.16        | 8.00            | 4.50            | 3.80             |
|                       | $\pm$ SEM | $\pm 0.11$ | $\pm 0.09$ | $\pm 0.54^a$ | $\pm 0.26^{ab}$ | $\pm 0.32^{ab}$ | $\pm 0.28^{bc}$  |
|                       | %         |            |            |              | -55.94          | -75.22          | -79.07           |
| TGF- $\beta$ (%)      | Mean      | 17.00      | 18.50      | 46.30        | 32.60           | 26.50           | 20.50            |
|                       | $\pm$ SEM | $\pm 0.82$ | $\pm 0.63$ | $\pm 2.17^a$ | $\pm 1.82^{ab}$ | $\pm 1.82^{ab}$ | $\pm 1.03^{bc}$  |
|                       | %         |            |            |              | -29.58          | -42.76          | -55.72           |
| CD95 <sup>+</sup> (%) | Mean      | 27.20      | 26.80      | 50.50        | 39.50           | 33.90           | 30.60            |
|                       | $\pm$ SEM | $\pm 1.34$ | $\pm 1.45$ | $\pm 2.77^a$ | $\pm 1.22^{ab}$ | $\pm 1.93^{ab}$ | $\pm 1.68^{bc}$  |
|                       | %         |            |            |              | -21.78          | -32.87          | -39.40           |
| IL-6 (%)              | Mean      | 21.55      | 21.10      | 49.00        | 41.55           | 34.55           | 23.80            |
|                       | $\pm$ SEM | $\pm 1.76$ | $\pm 1.76$ | $\pm 2.34^a$ | $\pm 1.38^{ab}$ | $\pm 1.38^{ab}$ | $\pm 1.72^{bc}$  |
|                       | %         |            |            |              | -15.20          | -29.48          | -51.42           |

Values expressed as  $\pm$  SEM (n = 6). <sup>a,b & c</sup> are Significant differences ( $P \leq 0.05$ ) compared to control, diabetic untreated and DPPD-diabetic treated groups, respectively. % is the percent of change compared to the diabetic group.

**Table S4.** Pancreatic T-Helper (CD 4<sup>+</sup>) and T-Cytotoxic (CD 8<sup>+</sup>) %.

|                        |             | Control | DPPD  | Diabetic (D)        | D + DPPD            | D + AD-MSC           | D + AD-MSCs+DPPD     |
|------------------------|-------------|---------|-------|---------------------|---------------------|----------------------|----------------------|
|                        | <b>Mean</b> | 24.60   | 25.90 | 56.20               | 40.10               | 31.70                | 18.50                |
| <b>CD4<sup>+</sup></b> | <b>±SEM</b> | ± 1.10  | ±1.22 | ± 3.15 <sup>a</sup> | ±1.32 <sup>ab</sup> | ± 1.58 <sup>ab</sup> | ± 1.16 <sup>bc</sup> |
| <b>(%)</b>             | <b>%</b>    |         |       |                     | -28.64              | -43.59               | -67.08               |
|                        | <b>Mean</b> | 31.60   | 31.40 | 58.50               | 47.60               | 40.20                | 33.30                |
| <b>CD8<sup>+</sup></b> | <b>±SEM</b> | ± 1.25  | ±1.85 | ± 2.35 <sup>a</sup> | ±1.74 <sup>ab</sup> | ± 1.22 <sup>ab</sup> | ± 1.54 <sup>bc</sup> |
| <b>(%)</b>             | <b>%</b>    |         |       |                     | -18.63              | -31.28               | -43.07               |

Values expressed as ± SEM (n = 6). <sup>a,b & c</sup> are Significant differences ( $P \leq 0.05$ ) compared to control, diabetic untreated and DPPD-diabetic treated groups, respectively. % is the percent of change compared to the diabetic group.

**Table S5.** Pancreatic P53, caspase 3, & Bcl-2 %.

|                  |             | Control | DPPD   | Diabetic (D)        | D + DPPD             | D + AD-MSCs          | D + AD-MSCs+DPPD    |
|------------------|-------------|---------|--------|---------------------|----------------------|----------------------|---------------------|
| <b>P53</b>       | <b>Mean</b> | 12.00   | 13.00  | 61.50               | 33.50                | 23.50                | 12.50               |
|                  | <b>±SEM</b> | ± 1.21  | ± 1.45 | ± 5.63 <sup>a</sup> | ± 2.26 <sup>ab</sup> | ± 1.98 <sup>ab</sup> | ± 1.33 <sup>b</sup> |
|                  | <b>%</b>    |         |        |                     | -45.52               | -99.16               | -79.67              |
| <b>Caspase 3</b> | <b>Mean</b> | 34.50   | 32.50  | 80.50               | 59.25                | 50.50                | 39.00               |
|                  | <b>±SEM</b> | ± 2.42  | ± 3.22 | ± 4.71 <sup>a</sup> | ± 3.93 <sup>ab</sup> | ± 3.26 <sup>ab</sup> | ± 2.37 <sup>b</sup> |
|                  | <b>%</b>    |         |        |                     | -26.39               | -37.26               | -51.55              |
| <b>Bcl-2</b>     | <b>Mean</b> | 48.50   | 47.50  | 12.50               | 27.00                | 35.55                | 43.30               |
|                  | <b>±SEM</b> | ± 2.19  | ± 2.16 | ± 0.27 <sup>a</sup> | ±1.24 <sup>ab</sup>  | ± 1.27 <sup>ab</sup> | ± 1.62 <sup>b</sup> |
|                  | <b>%</b>    |         |        |                     | +116.00              | +184.40              | +246.40             |

Values expressed as ± SEM (n = 6). <sup>a,b & c</sup> are Significant differences (P ≤ 0.05) compared to control, diabetic untreated and DPPD-diabetic treated groups, respectively. % is the percent of change compared to the diabetic group.

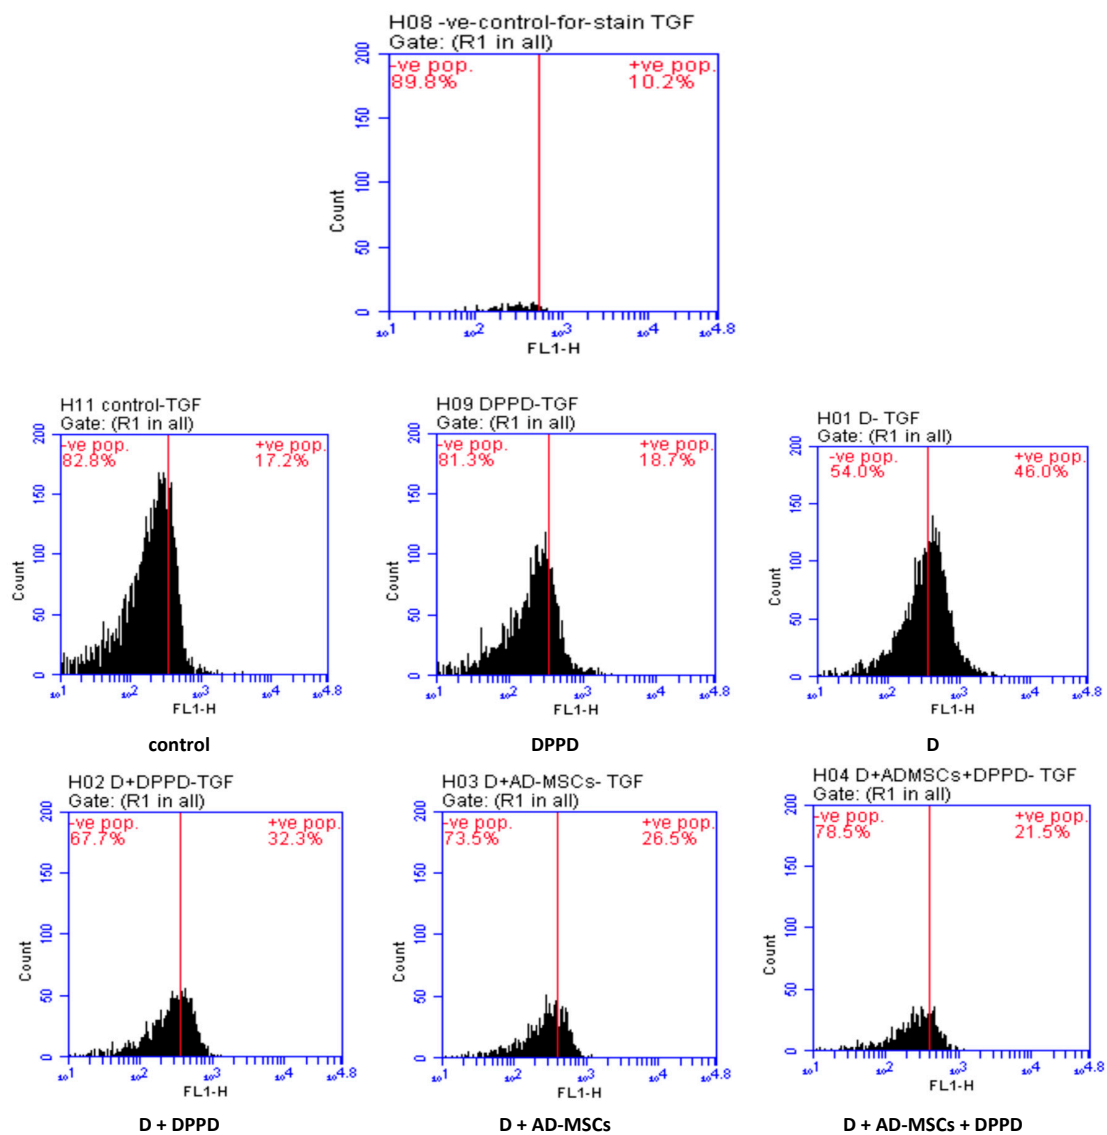

**Figure S1a. Pancreatic TGF- $\beta$  %**

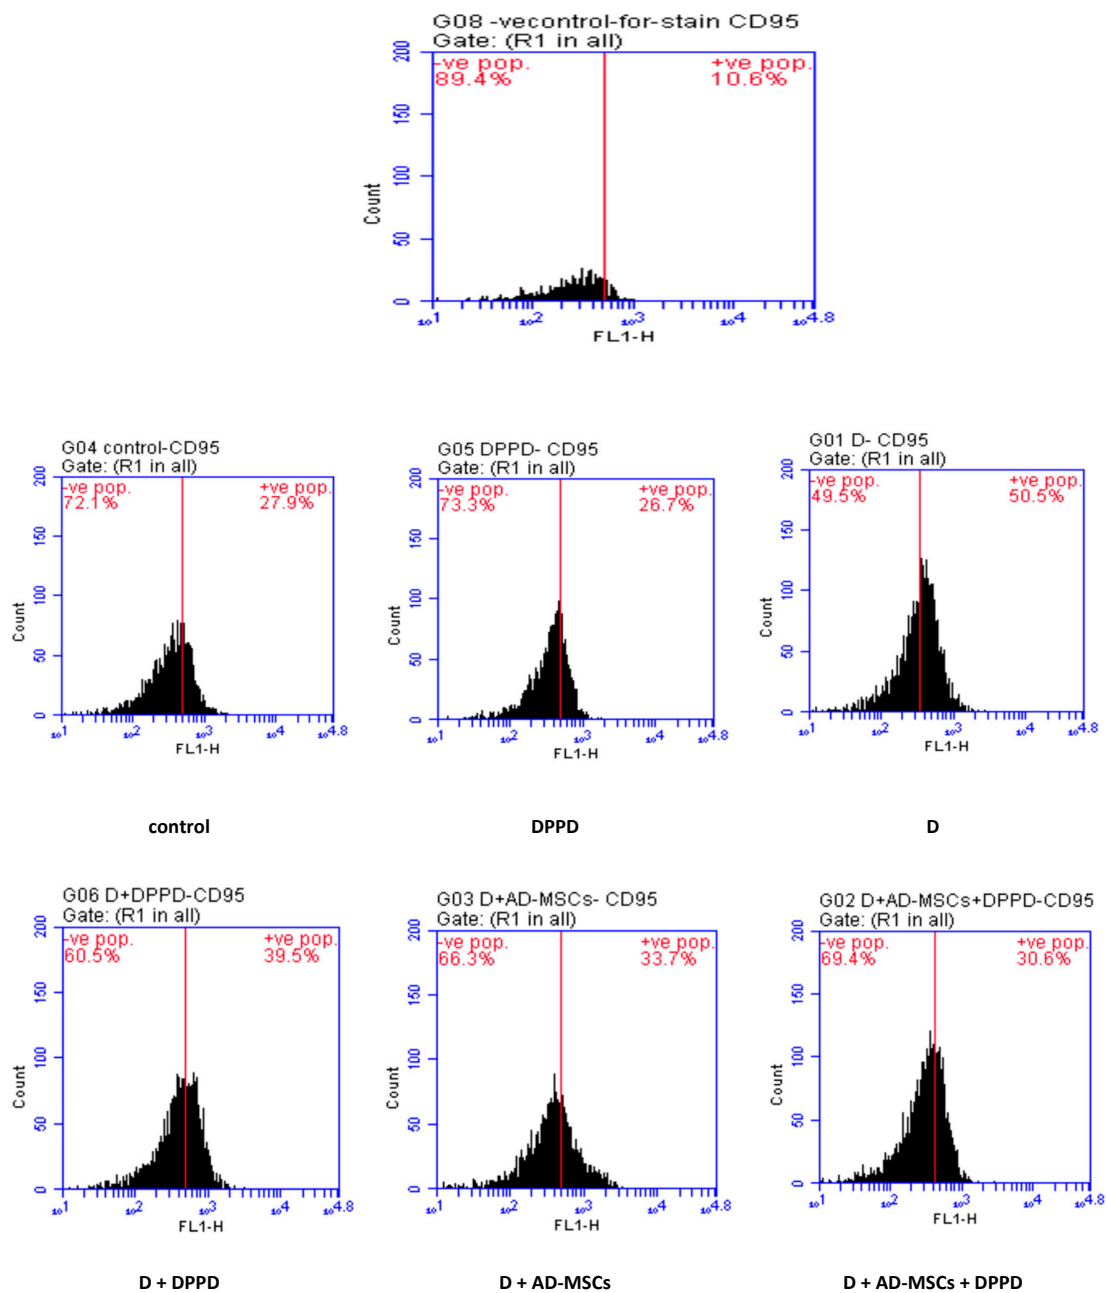

Figure S1b. Pancreatic CD95+ %.

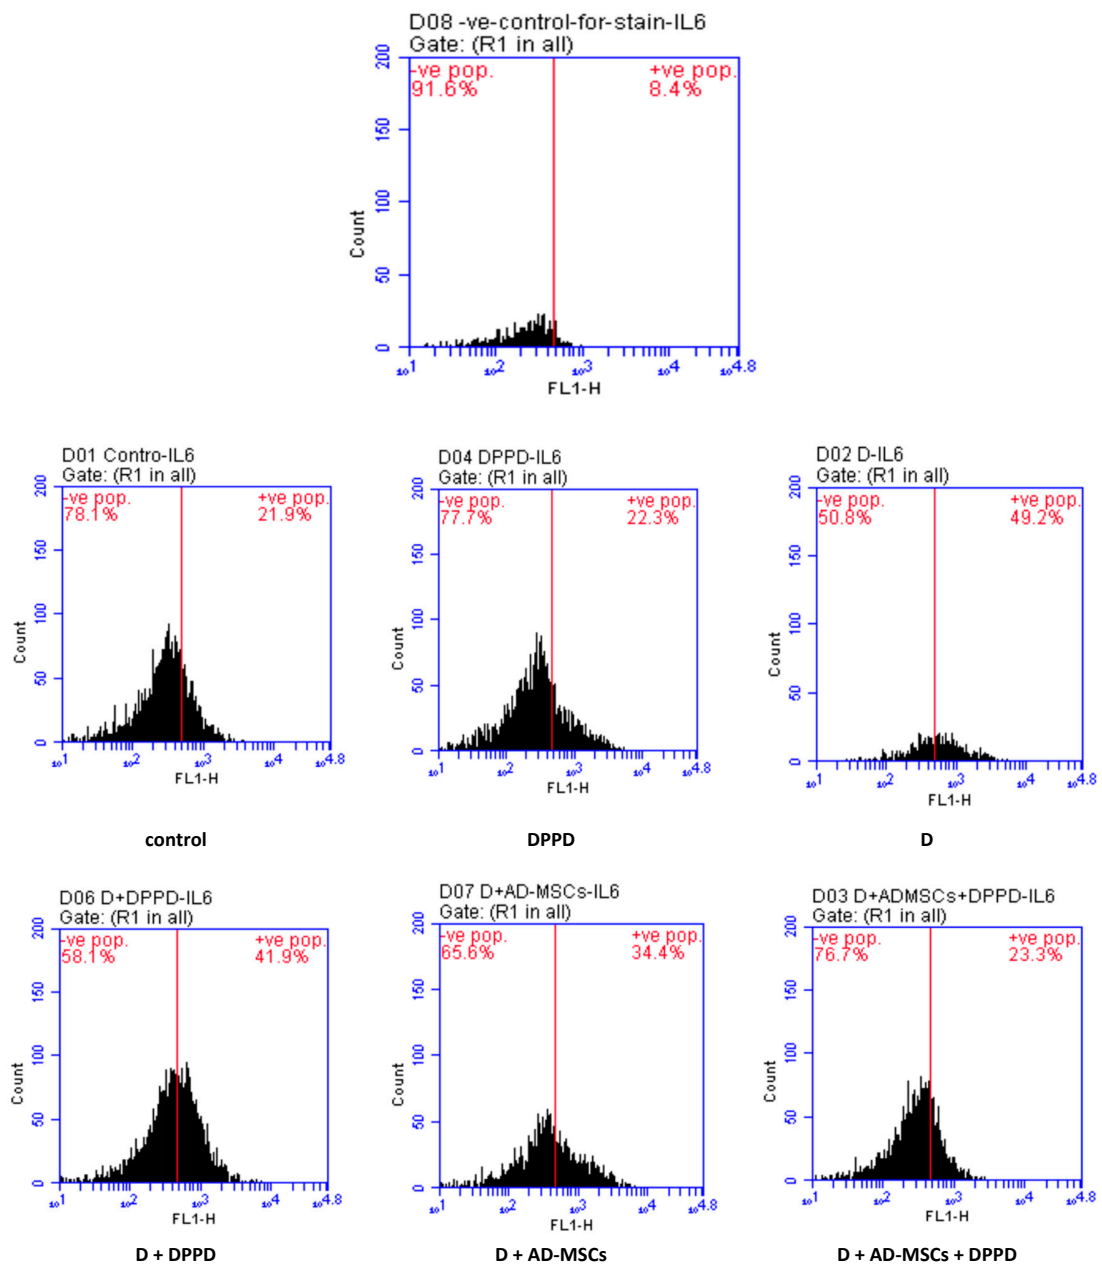

**Figure S1c. Pancreatic IL-6 %**

**Figure S1 (a-c). Pancreatic TGF- $\beta$ , CD95, and IL-6 levels.**

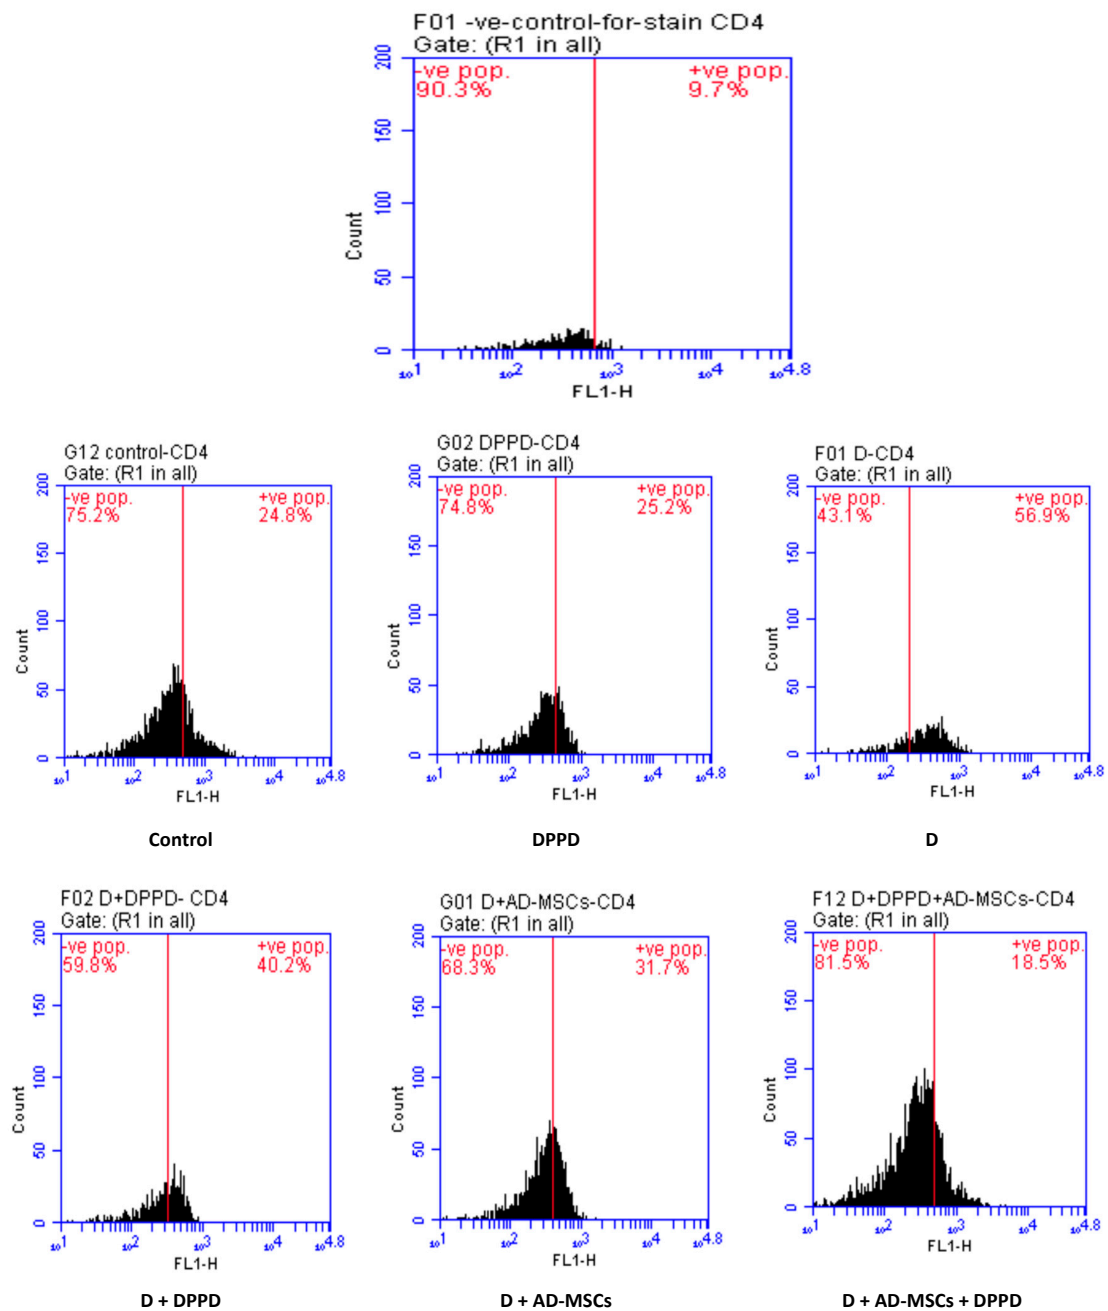

Figure S2a. Pancreatic CD4+ %.

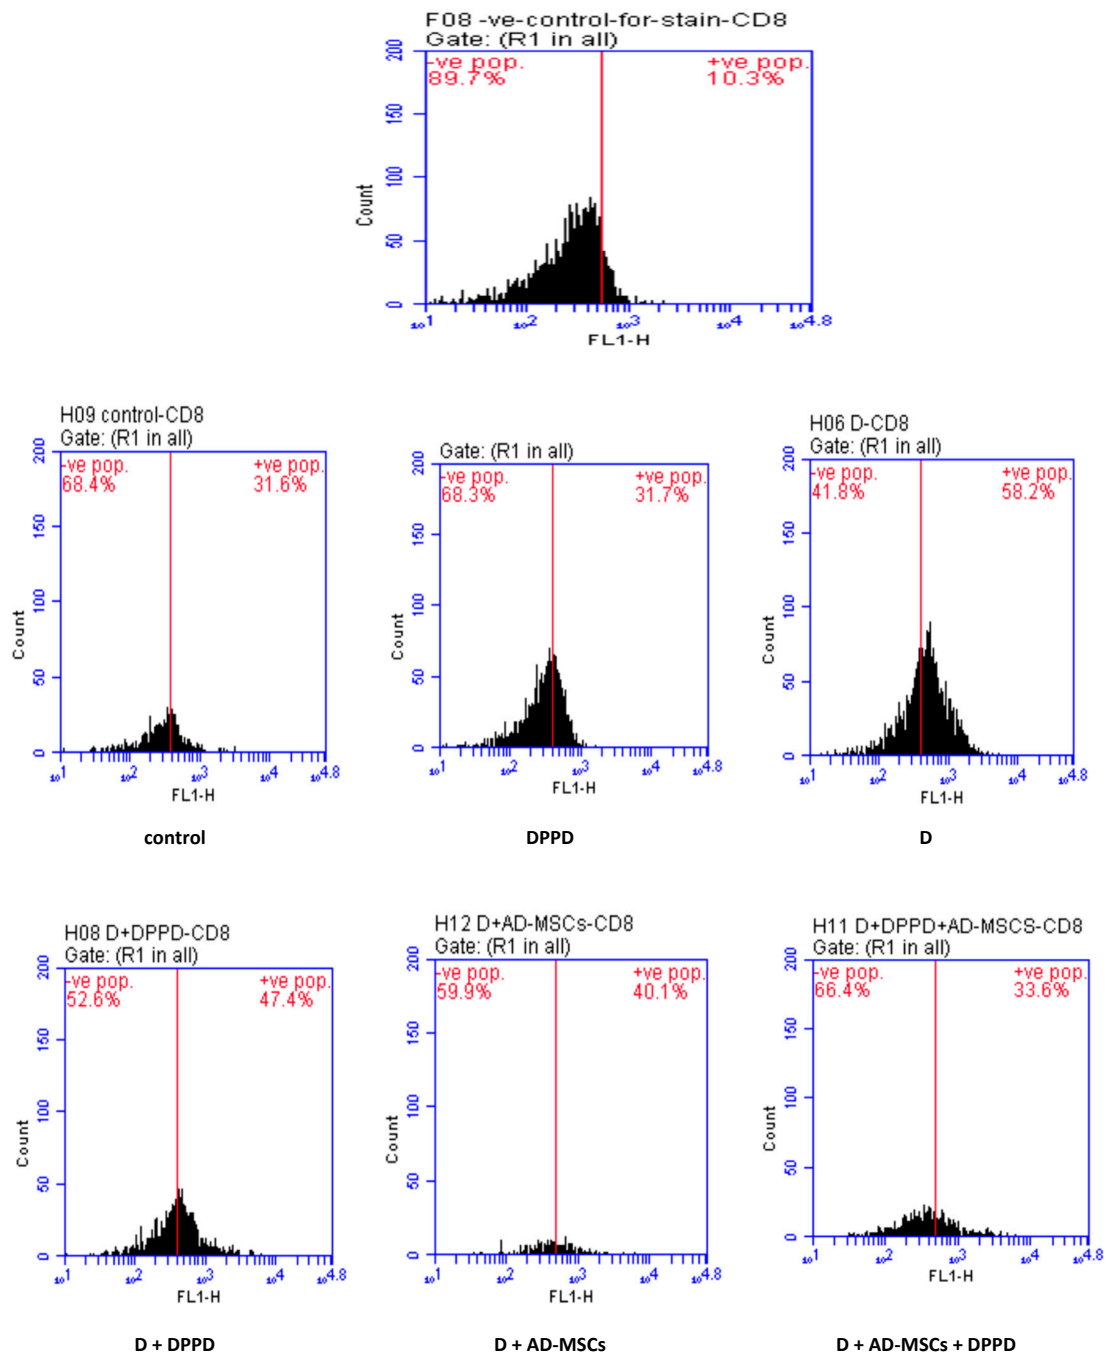

**Figure S2b. Pancreatic CD8+ %.**

**Figure S2 (a-b). Pancreatic T-Helper (CD 4<sup>+</sup>) and T-Cytotoxic (CD 8<sup>+</sup>) %.**

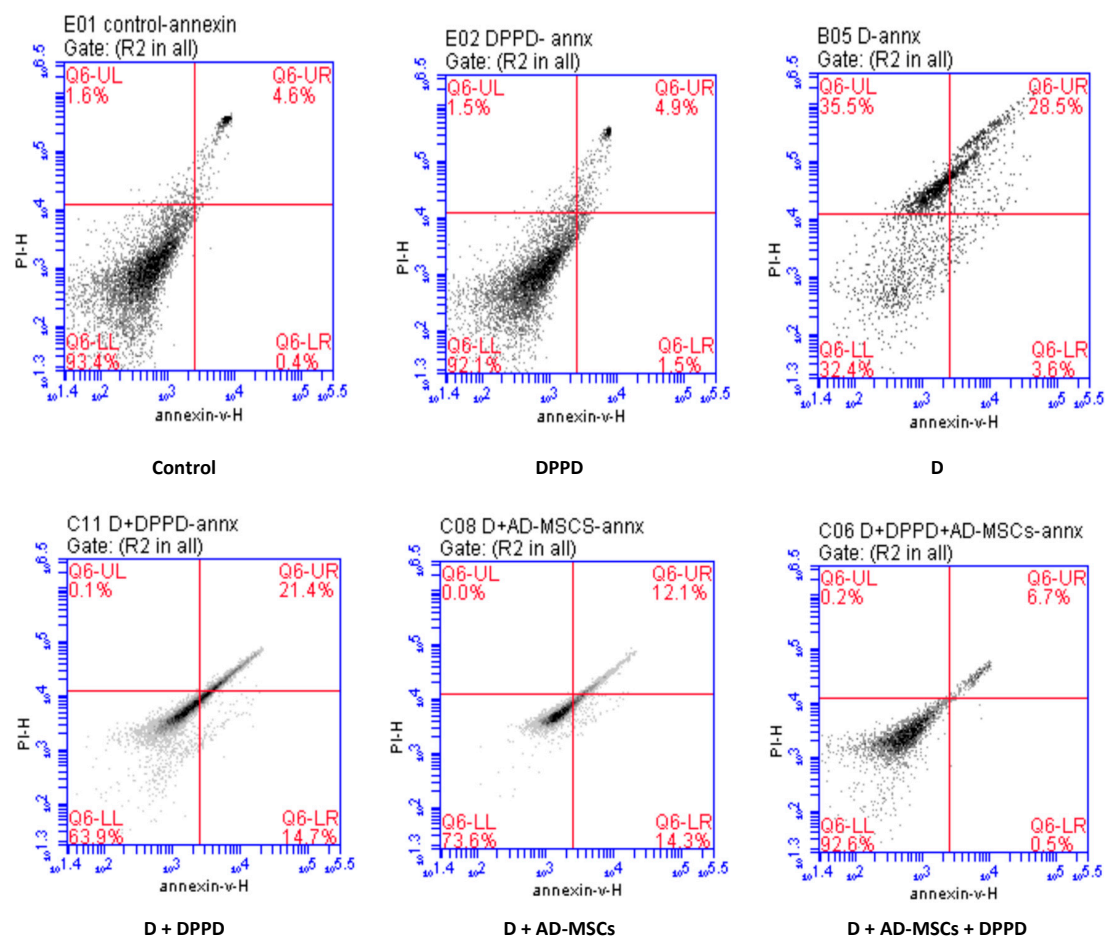

Figure S3a. Pancreatic annexin V %.

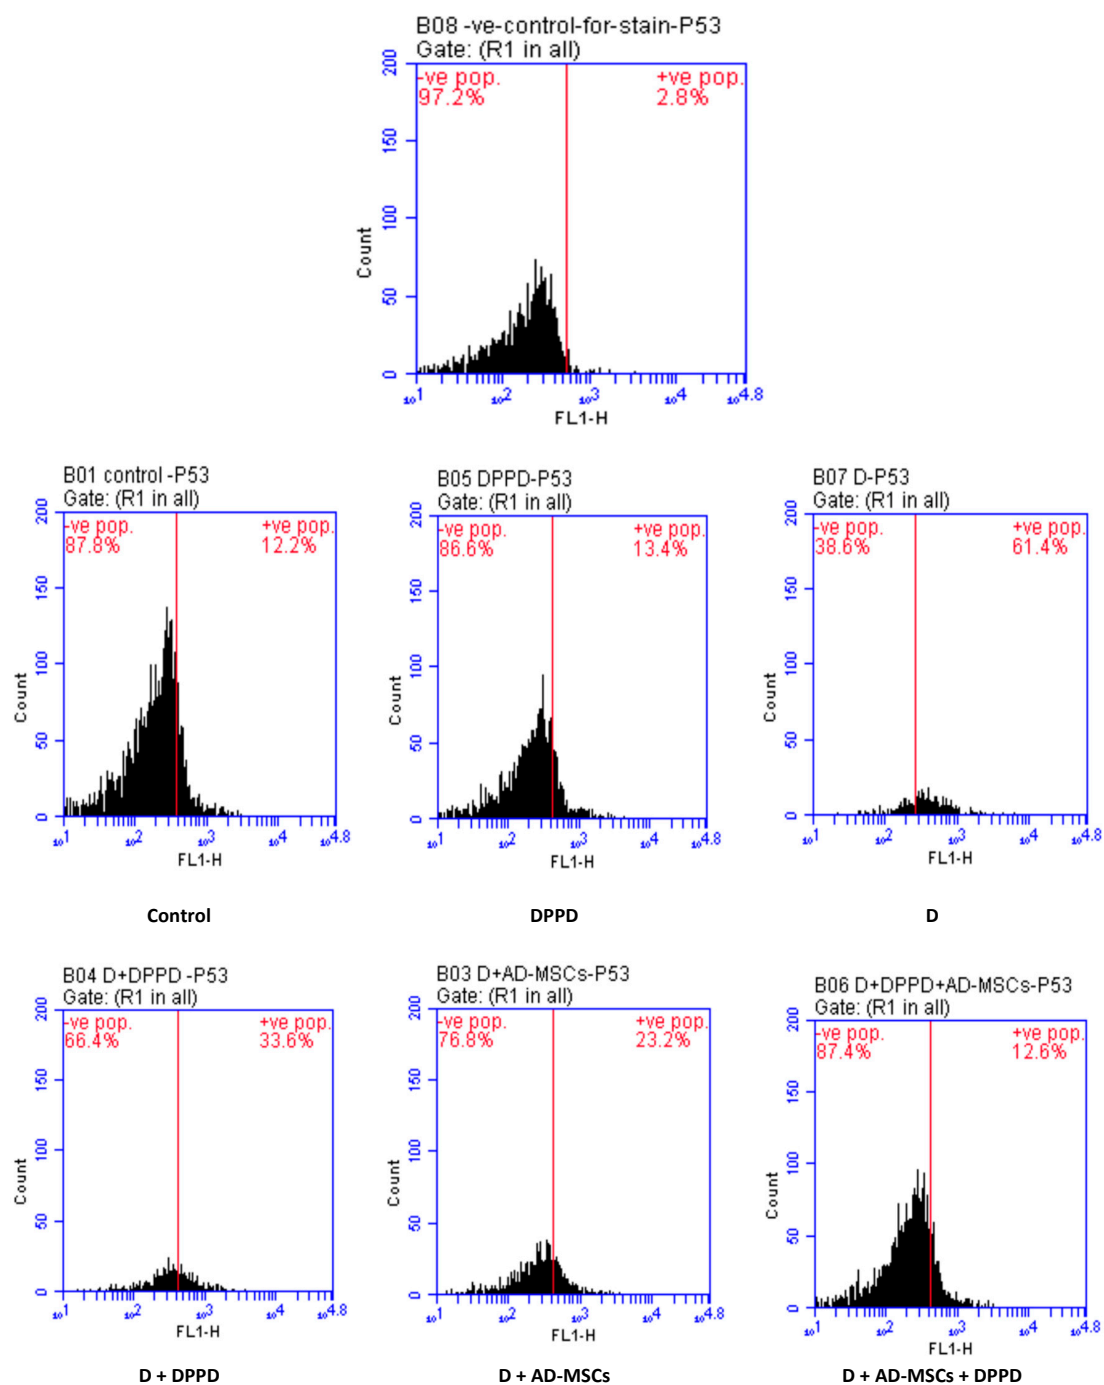

Figure S3b. Pancreatic P53 %

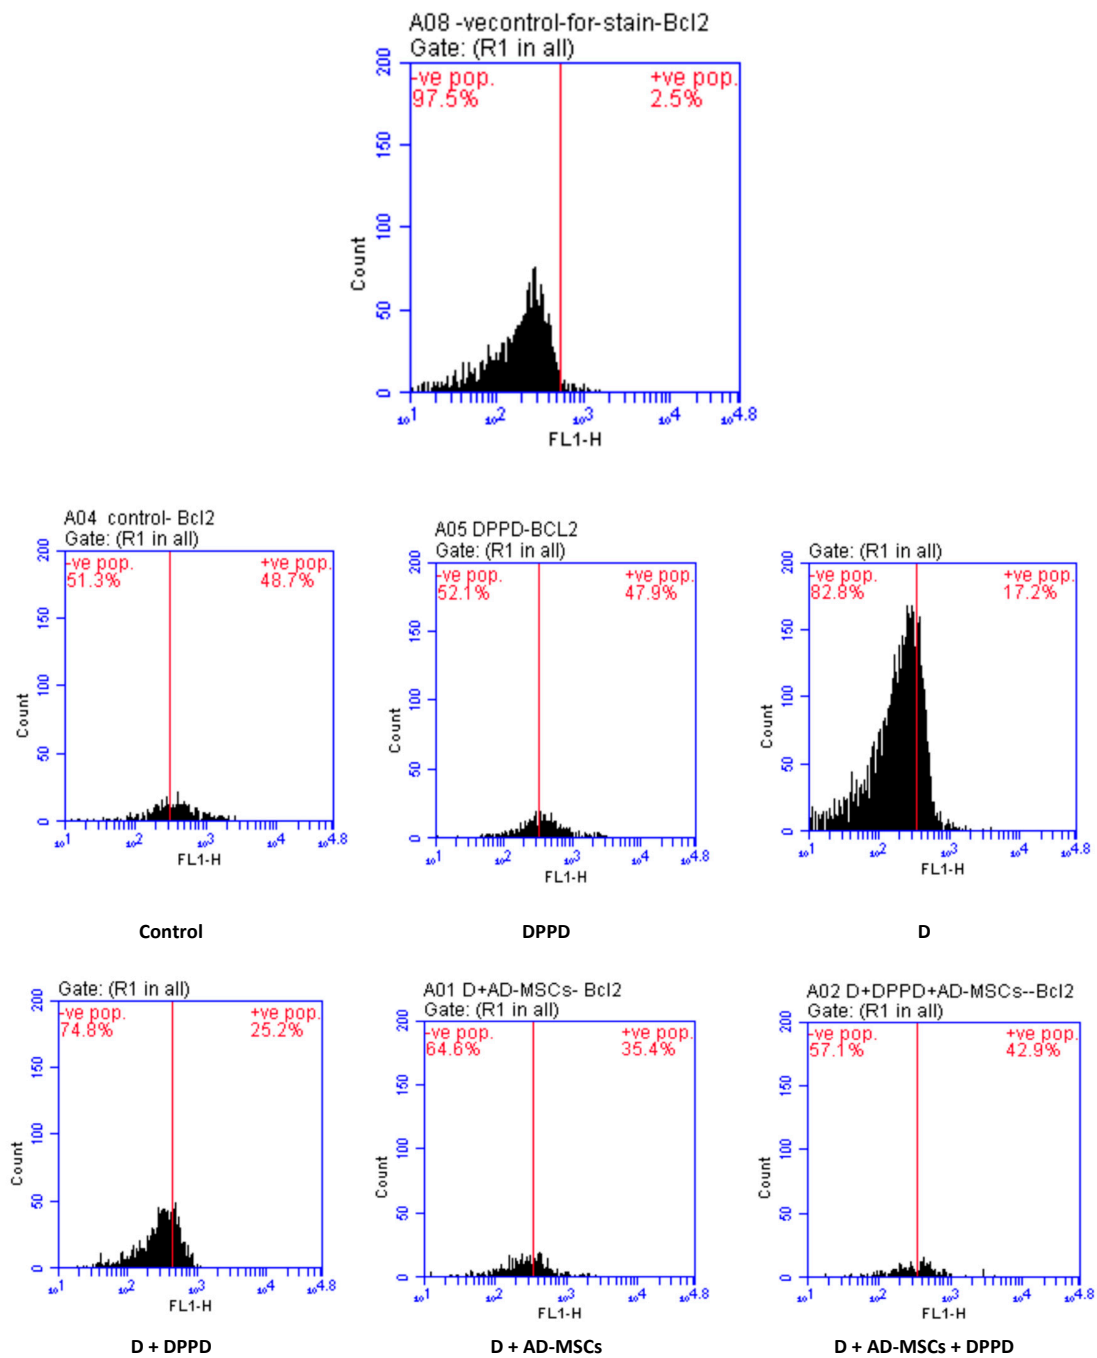

Figure S3c. Pancreatic Bcl-2 %.

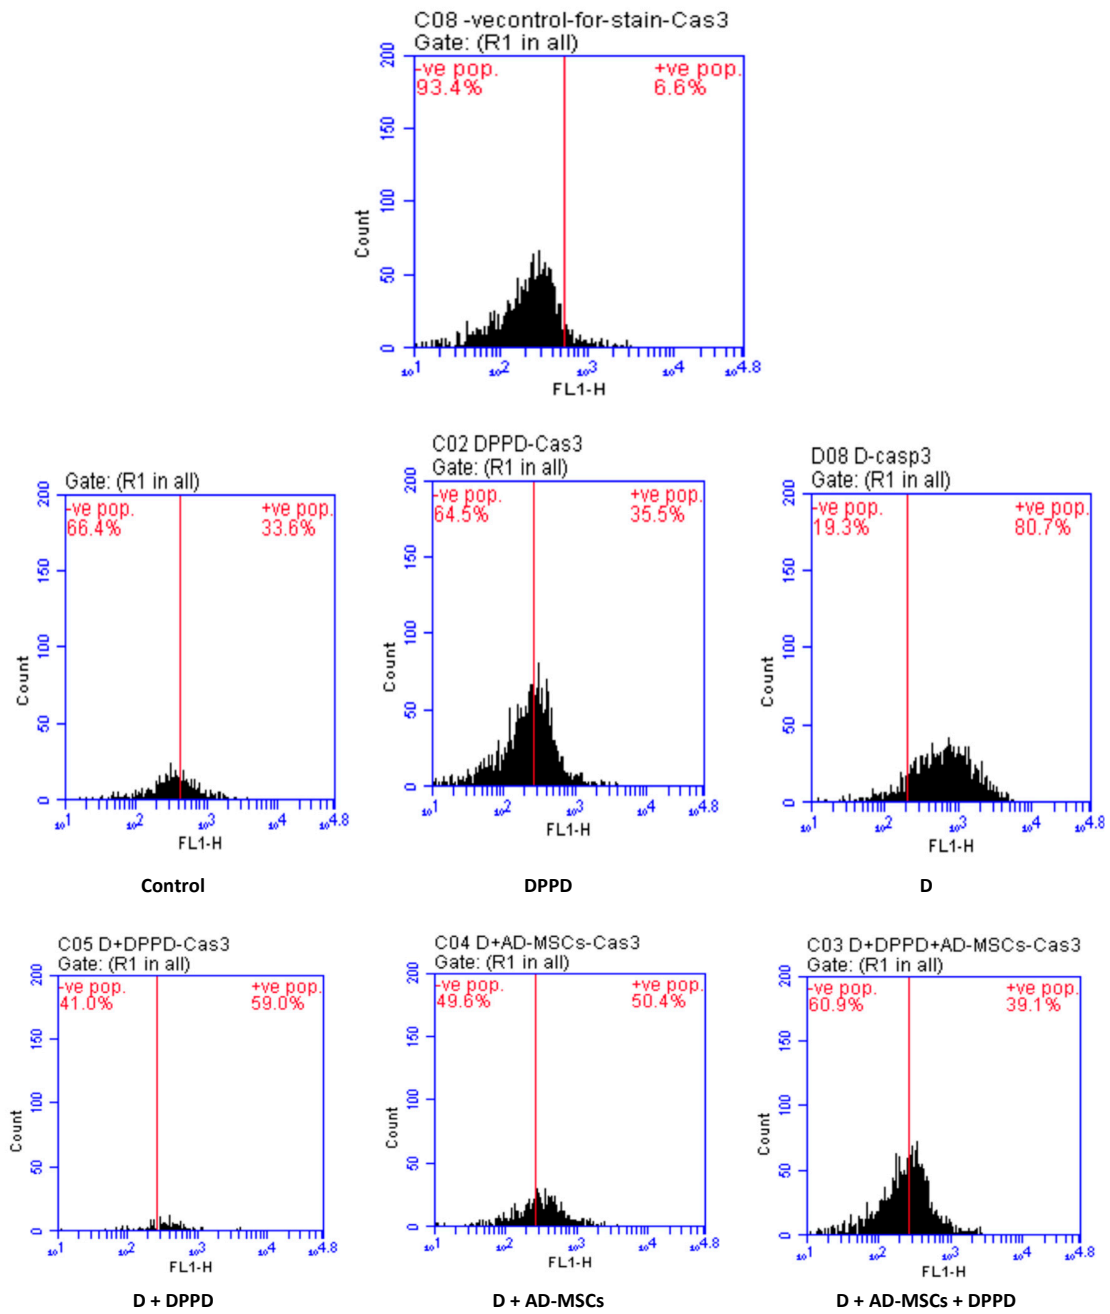

Figure S3d. Pancreatic caspase 3 %.

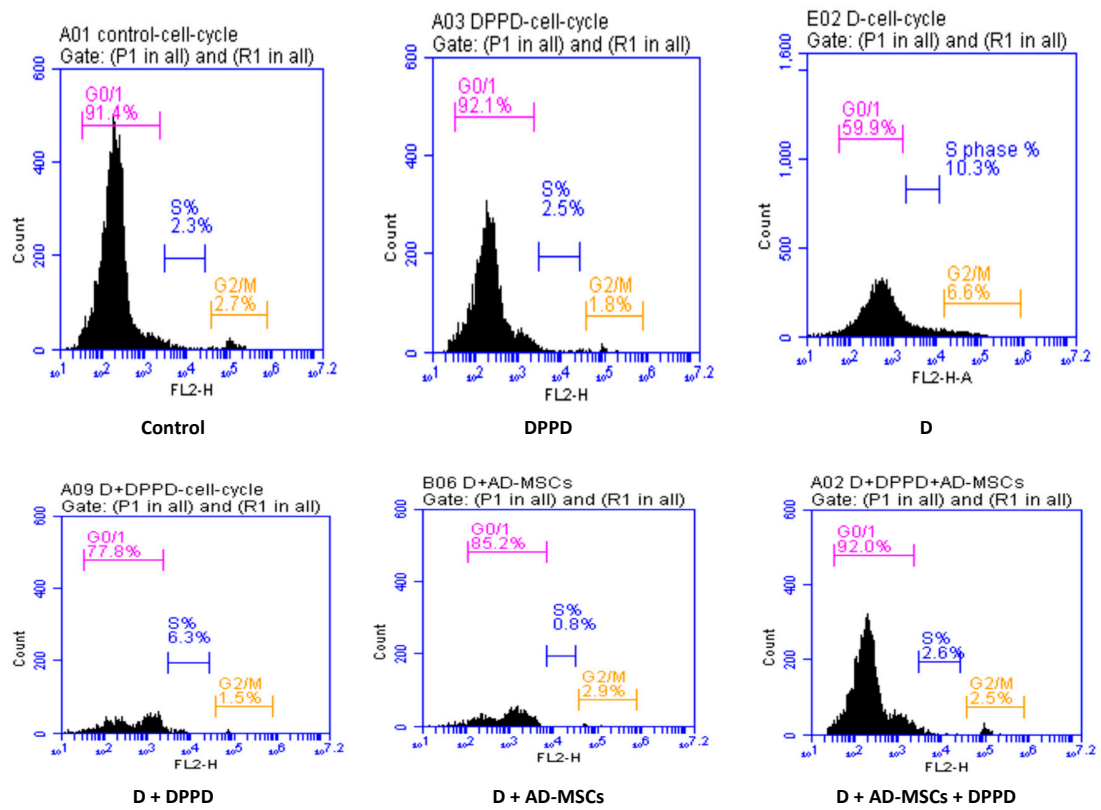

**Figure S3e. Pancreatic viable cells (G0/G1) %.**

**Figure S3 (a-e). Pancreatic annexin V, P53, caspase 3, Bcl-2 & viable cells (G0/G1) %.**

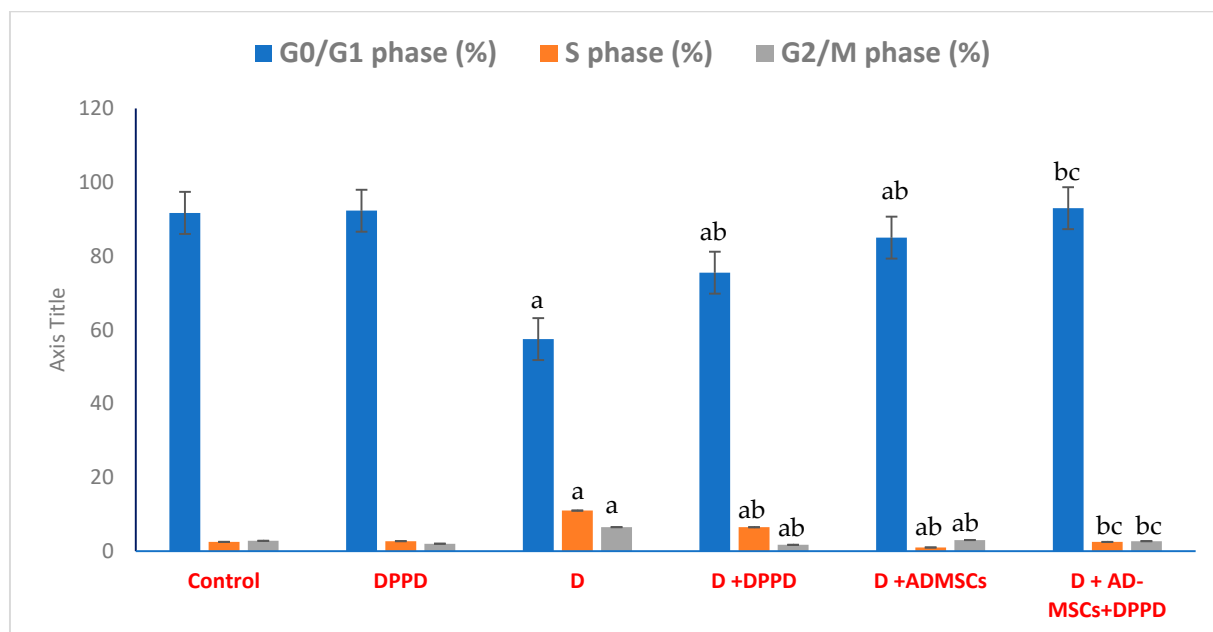

**Figure S4.** Pancreatic cell cycle %. Values expressed as  $\pm$  SEM (n = 6). <sup>a,b</sup> & <sup>c</sup> are Significant differences ( $P \leq 0.05$ ) compared to control, diabetic untreated and DPPD-diabetic treated groups, respectively. % is the percent of change compared to the diabetic group.

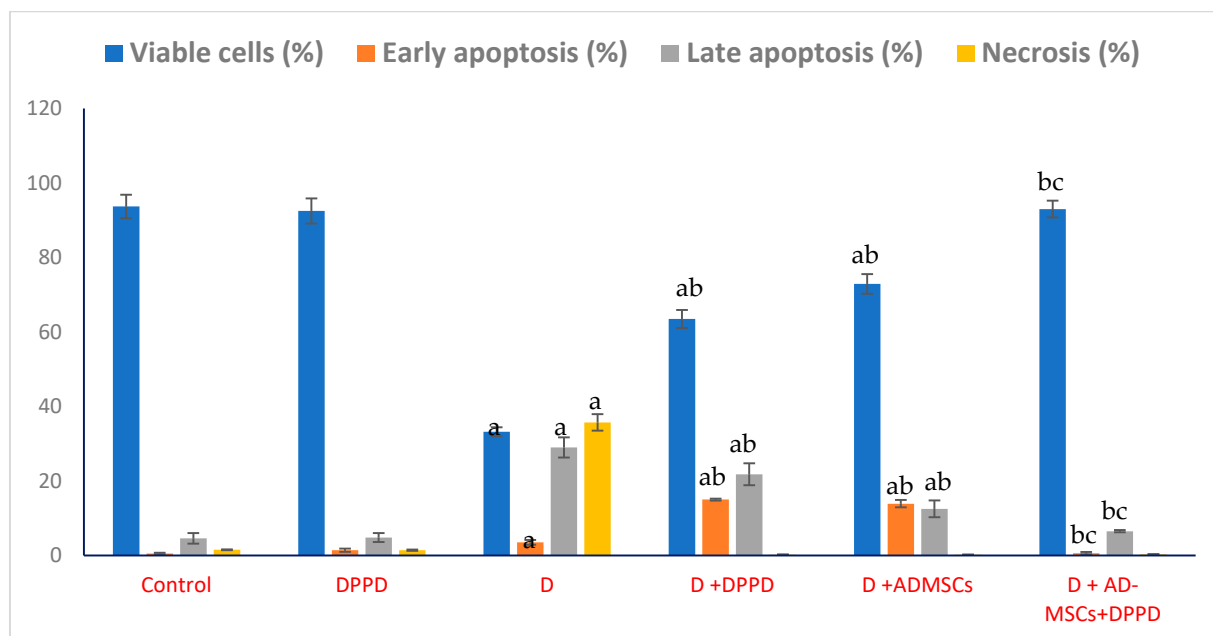

**Figure S5.** Pancreatic annexin V %. Values expressed as  $\pm$  SEM (n = 6). <sup>a,b</sup> & <sup>c</sup> are Significant differences ( $P \leq 0.05$ ) compared to control, diabetic untreated and DPPD-diabetic treated groups, respectively. % is the percent of change compared to the diabetic group.
